# Supplementary material for: Enhancing the performance of molecule-based piezoelectric sensors by optimizing their microstructures
Source: Royal Society of Chemistry journal article supplement (doi:10.1039/d4sc05442c), 2024-01-01
Supplement: d4sc05442c1.pdf [file d4sc05442c1.pdf]

## Enhancing the Performance of Molecule-Based Piezoelectric Sensors by Optimizing Their Microstructures

Zheng-Xiao Tang, Bin Wang, Zhi-Rui Li, Zhuo Huang, Hai-Xia Zhao,\* La-Sheng Long,\* Lan-Sun

Zheng

State Key Laboratory of Physical Chemistry of Solid Surfaces and Department of Chemistry,

College of Chemistry and Chemical Engineering, Xiamen University, Xiamen, 361005, Fujian.

China.

### MEASUREMENT DETAILS:

All chemicals used in the synthesis were of reagent grade and were used without further purification.

#### X-ray crystallographic and powder X-ray diffraction (PXRD) measurements.

An Agilent Supernova CCD diffractometer utilizing Cu K $\alpha$  radiation ( $\lambda = 1.54178 \text{ \AA}$ ) in  $\omega$ -scan mode ( $\Delta\omega = 1.0^\circ$ ) was used for the collection of the single crystal data for **1** at 300 K. The CrysAlis PRO program was applied to execute data collection, cell refinement and data reduction. The structures were determined by direct methods using ShelXT and refined by full-matrix least squares on  $F^2$  by using ShelXL in the OLEX2 program. CCDC 2208701 (**1**) can be obtained free of charge from the Cambridge Crystallographic Data Centre and contain the supplementary crystallographic data for this paper. A Rigaku Ultima IV X-ray diffractometer was used for room temperature PXRD measurements.

#### Thermogravimetric analysis (TGA) and differential thermal analysis (DTA)

Thermogravimetric analysis and differential thermal analysis curve were collected on a STA-449-F5 Jupiter from Netzsch at the rate of  $10 \text{ K min}^{-1}$  under the air atmosphere.

#### SHG measurements

Optical second harmonic generation (SHG) measurements were carried out with an

integrated instrument, which ensured low divergence (pulsed Nd:YAG at a wavelength of 1064 nm, 10 Hz repetition rate, 1.6 MW peak power, 5 ns pulse duration) for the unexpanded laser (OPOTEK, 355 II). SHG experiments were performed using powder of **1** at room temperature.

#### **$d_{33}$ measurement**

The polycrystalline films fabricated by powder of **1** were firstly poled on a high-voltage polarization device (DW-P303-1ACDF0, DONG WEN VOLTAGE, China) before  $d_{33}$  testing. The  $d_{33}$  was measured on a ZJ-6A (Institute of Acoustics, China).

#### **Polarization–electric field ( $P$ - $E$ ) hysteresis loop measurements.**

Polarization–electric field ( $P$ - $E$ ) hysteresis loop was measured using a Radiant Precision Premier II analyzer. To eliminate small electric conductivity contributions, the positive up negative down (PUND) method was employed. The polycrystalline thin films were fabricated by slowly evaporating a drop of saturated aqueous solution of **1** onto cleaned ITO-coated glass. The  $P$ - $E$  hysteresis loop measurements were conducted using a capacitor structure composed of a copper column electrode, polycrystalline thin film and ITO-coated glass, with the copper column electrode serving as the top electrode and conductive ITO as the bottom electrode, respectively.

#### **SEM measurements.**

All types of composite films were observed using a ZEISS Sigma scanning electron microscope from ZEISS and SU8600 from Hitachi.

#### **Open-circuit voltage and short-circuit current measurements.**

The piezoelectric open-circuit voltage and short-circuit current of composite film devices with **1** were recorded with a Keithley electrometer (6517B).

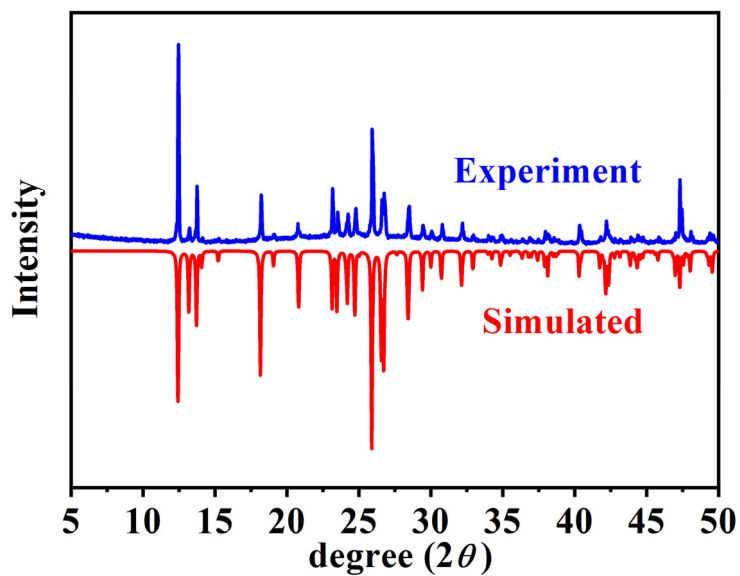

Figure S1 PXRD patterns of **1** at room temperature.

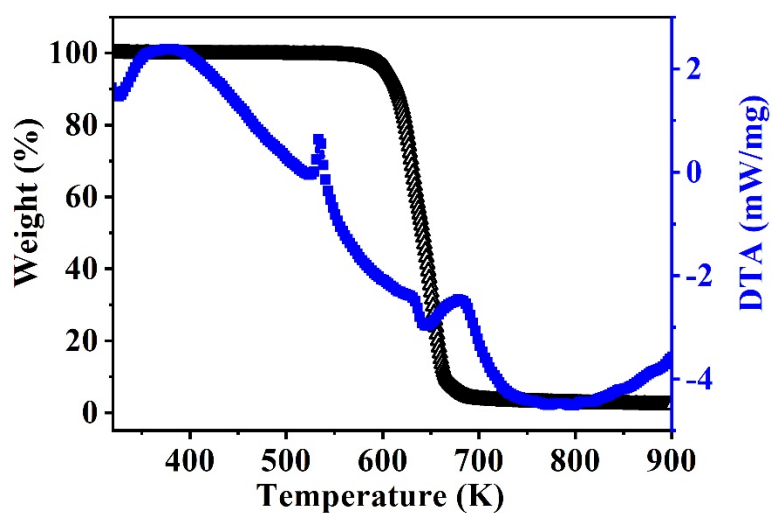

Figure S2 TG and DTA curve of **1**.

(a)

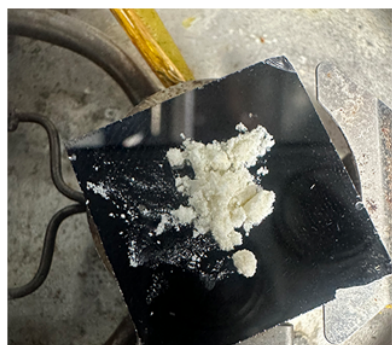

(b)

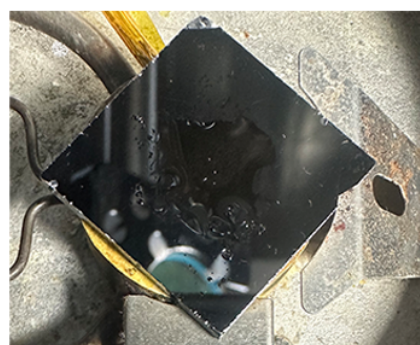

Figure S3 Optical images of **1**: (a) powder of **1**, (b) melt of **1**.

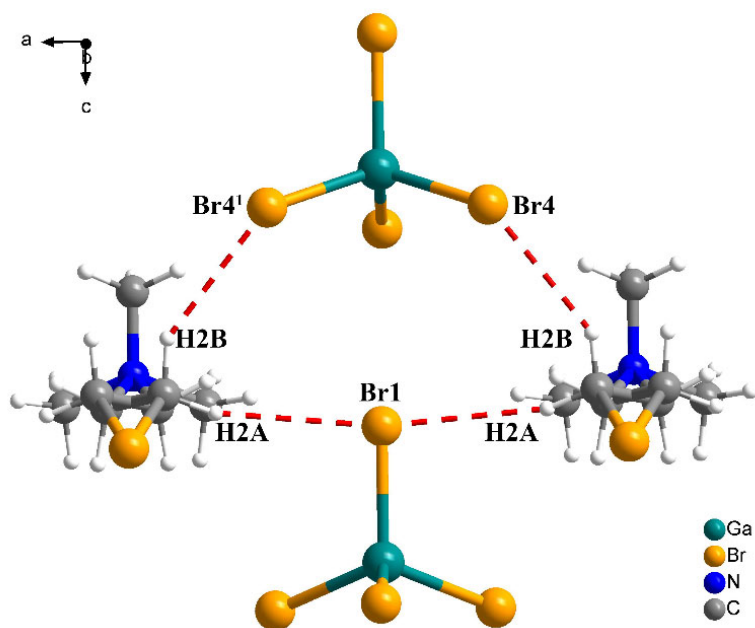

**Figure S4** The Br $\cdots$ H—C distance between adjacent [GaBr $_4$ ] $^-$  anions and [(CH $_3$ ) $_3$ NCH $_2$ CH $_2$ Br] $^+$  cations (Br1 $\cdots$ H2A—C2: 3.779 Å; Br4 $\cdots$ H2B—C2: 3.668 Å,  $^1$ -X,+Y,+Z).

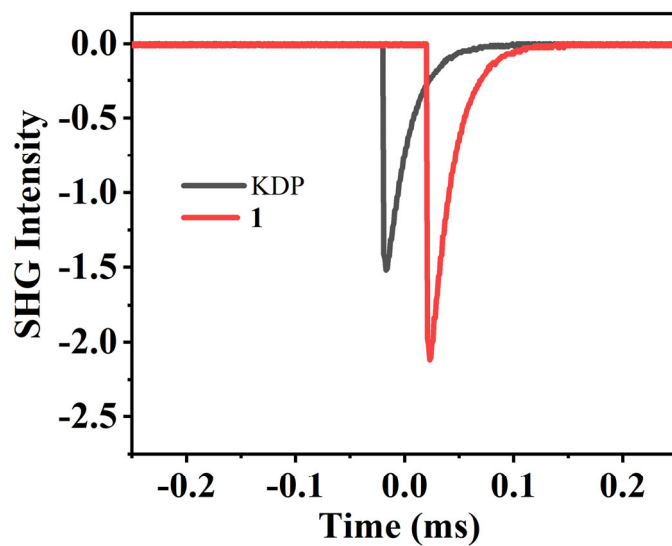

**Figure S5** SHG signal of **1** at room temperature.

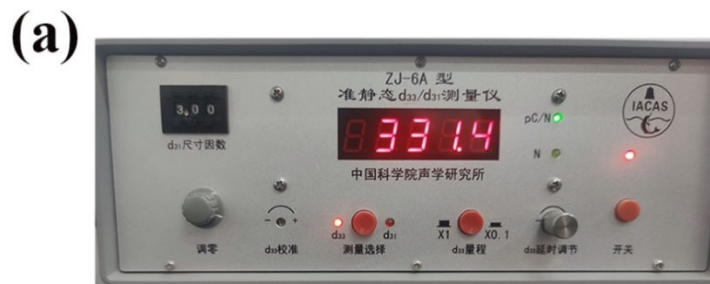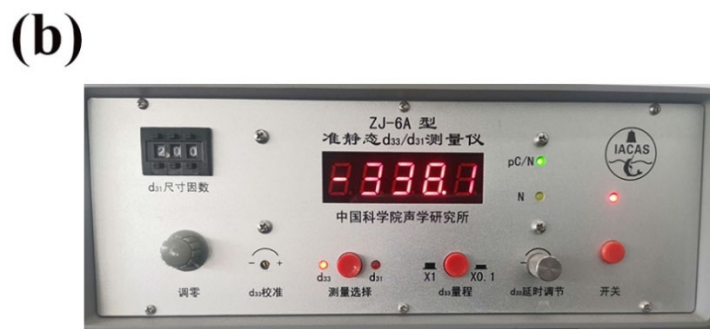

**Figure S6** Piezoelectric  $d_{33}$  data of **1** (polycrystalline films): (a) forward in up connection, (b) reverse in down connection.

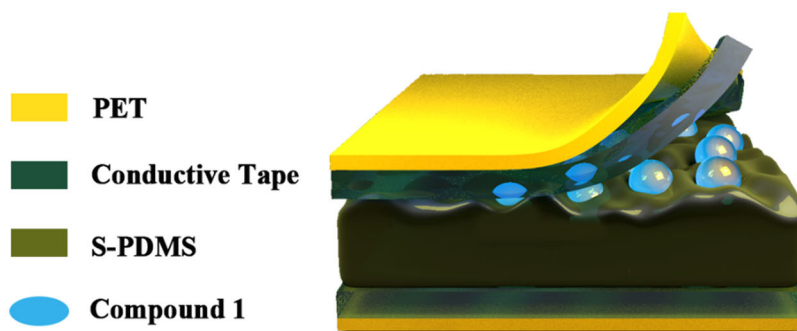

**Figure S7** Schematic of the **1**@S-PDMS sensor device structure.

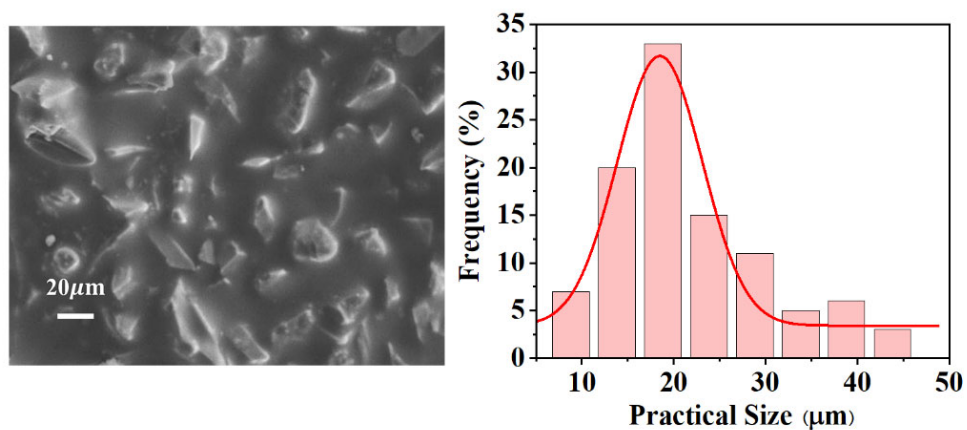

**Figure S8** SEM image of sandpaper (P800) and pore size distributions.

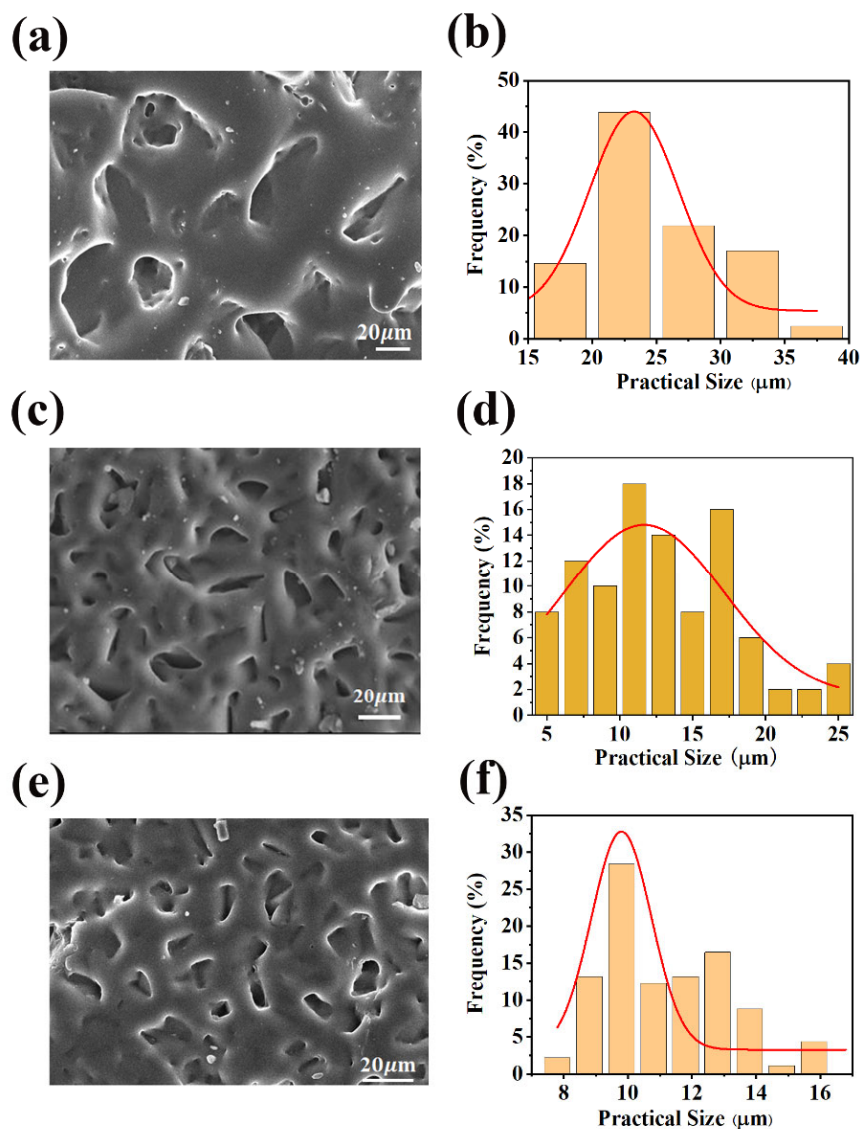

**Figure S9** SEM images of S-PDMS: (a) 600#, (c) 1200#, (e) 1500# and pore size distributions: (b) 600#, (d) 1200#, (f) 1500#.

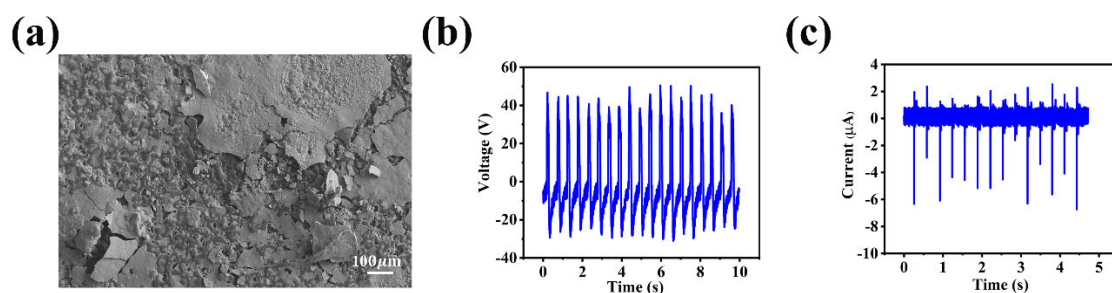

**Figure S10** (a) SEM image of 1@S-PDMS(800#) (spin-coating at 7 cycles without isopropanol);  $V_{oc}$  (b) and  $I_{sc}$  (c) for 1@S-PDMS(800#) (spin-coating at 7 cycles without isopropanol).

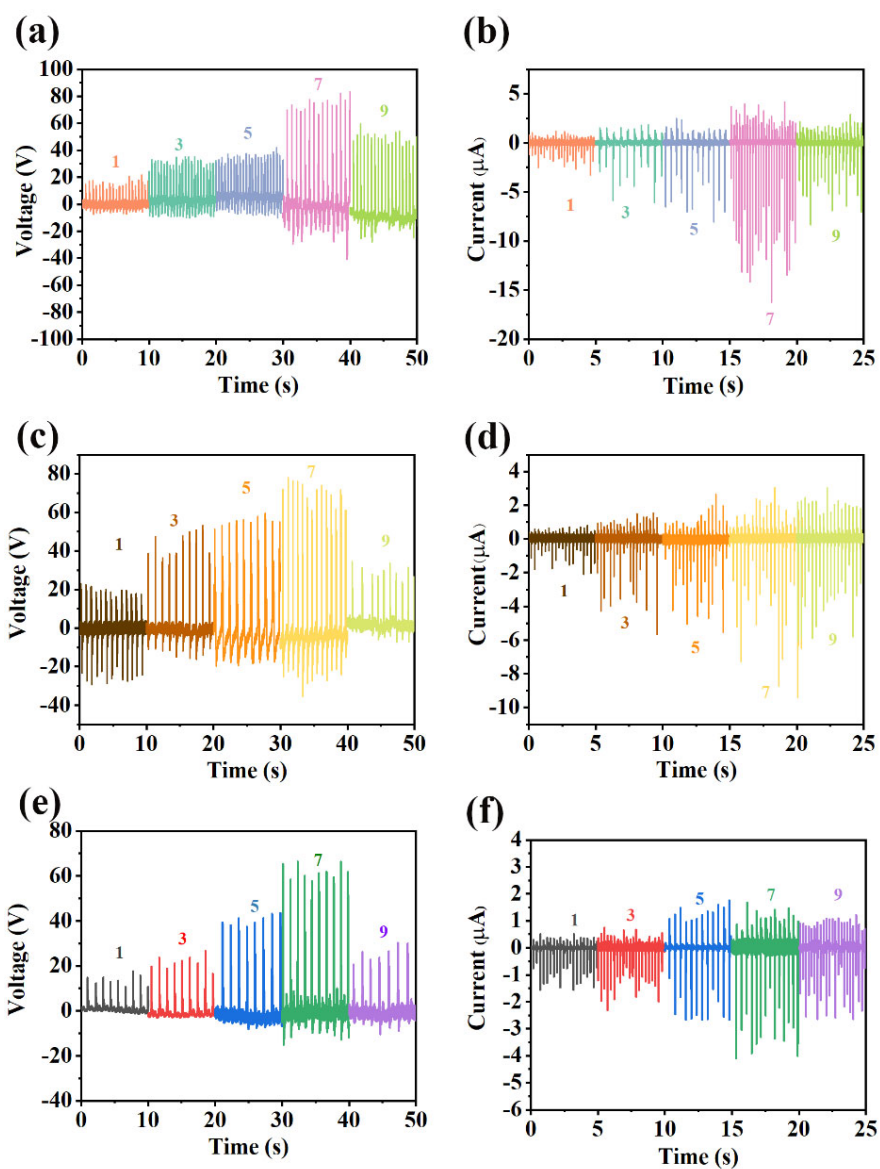

**Figure S11**  $V_{oc}$ : (a) 600#, (c) 1200#, (e) 1500# and  $I_{sc}$ : (b) 600#, (d) 1200#, (f) 1500# of 1@S-PDMS.

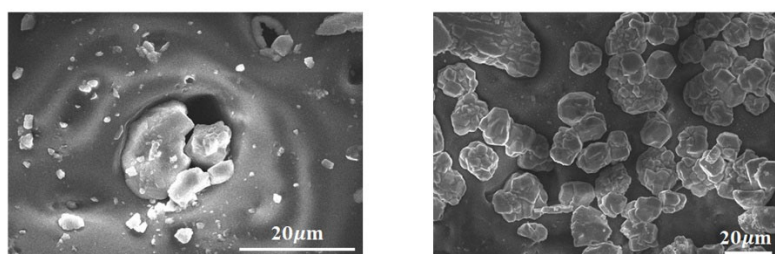

**Figure S12** 1 aggregate on S-PDMS(800#) when the spin-coating cycles exceed seven.



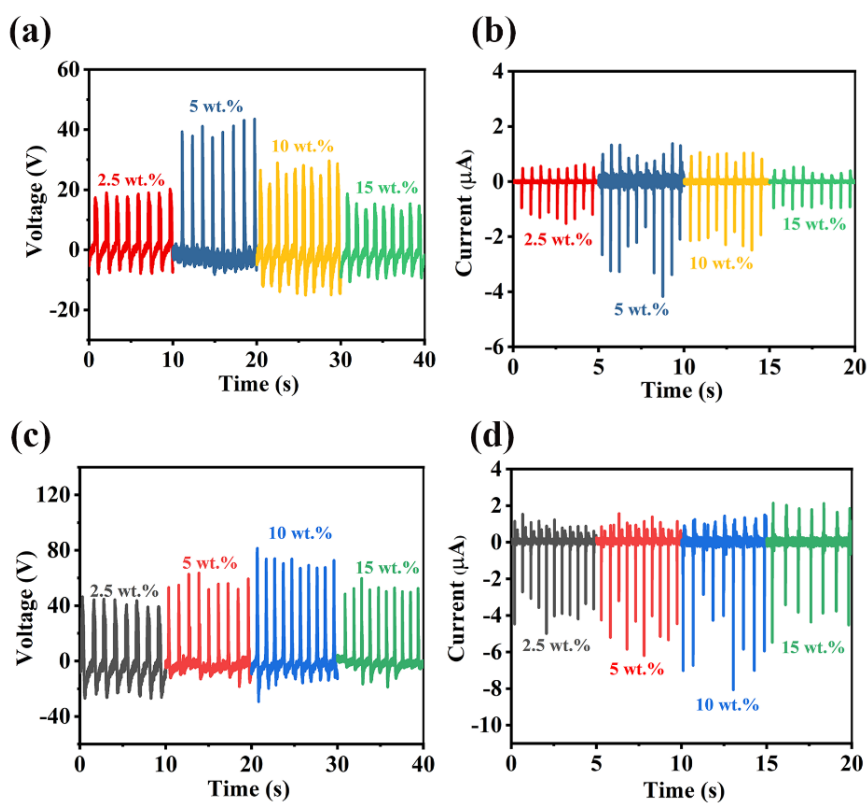

**Figure S13**  $V_{oc}$ : (a) 1-Flat-PDMS, (c) 1-S-PDMS and  $I_{sc}$ : (b) 1-Flat-PDMS, (d) 1-S-PDMS with different mass fractions using 20 N palm pressure.

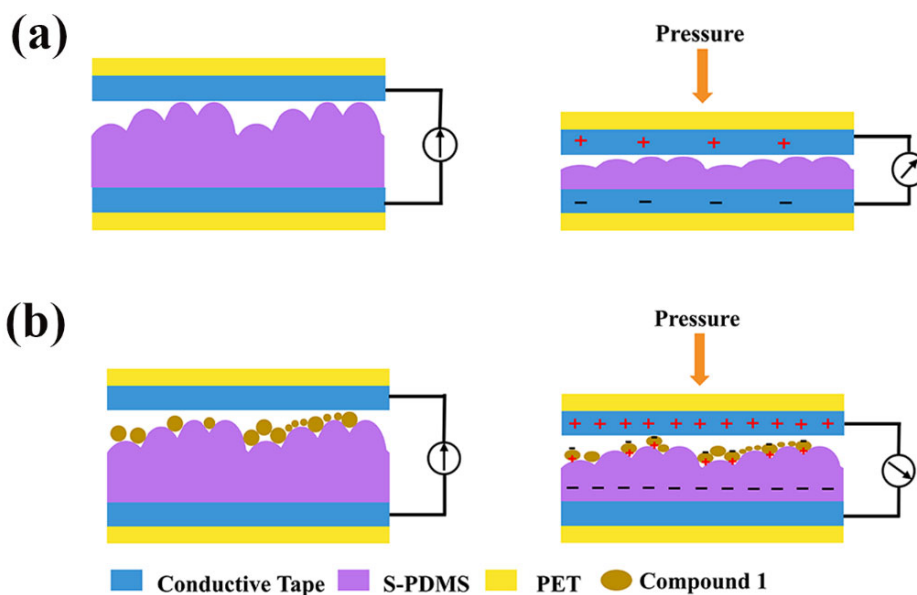

**Figure S14** (a) Working mechanism of the triboelectric energy harvester. (b) Working mechanism of the hybrid energy harvester that integrated the piezoelectric and triboelectric energy harvester.



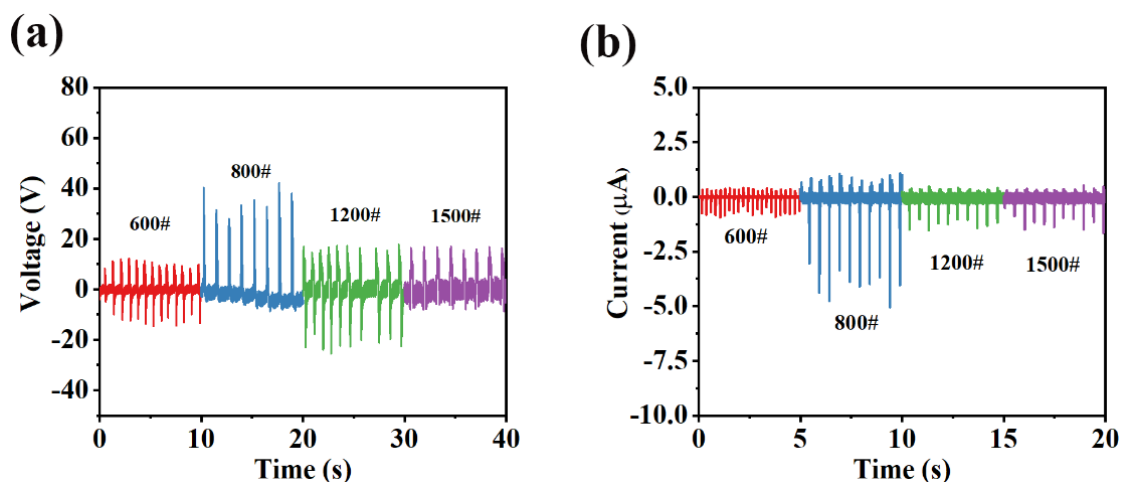

Figure S15  $V_{oc}$  (a) and  $I_{sc}$  (b) for S-PDMS(600#, 800#, 1200#, 1500#).

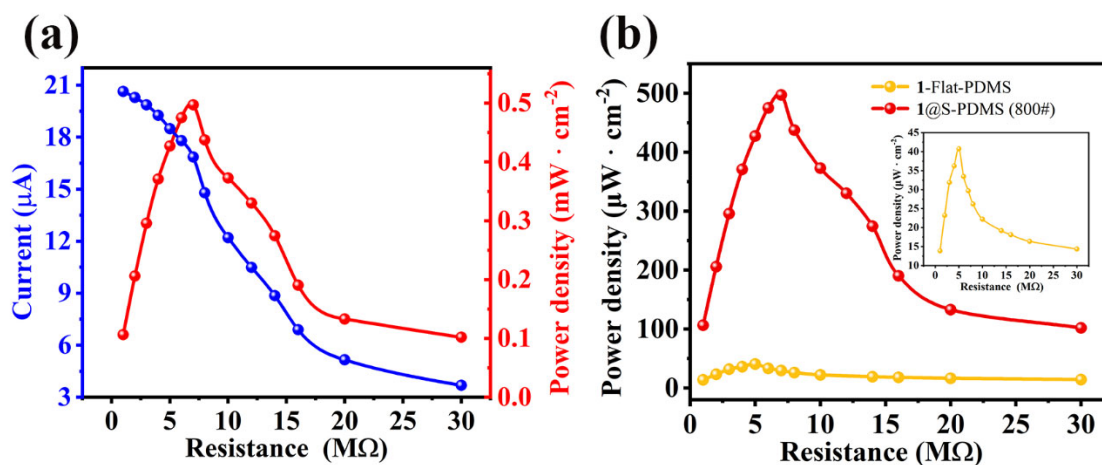

Figure S16 (a) The output current and power density under the condition of load resistances corresponding to the best performance device (1@S-PDMS(800#) (spin-coating at 7 cycles). (b) Power density of 1-Flat-PDMS (mass fraction of powder 1 is 5%).

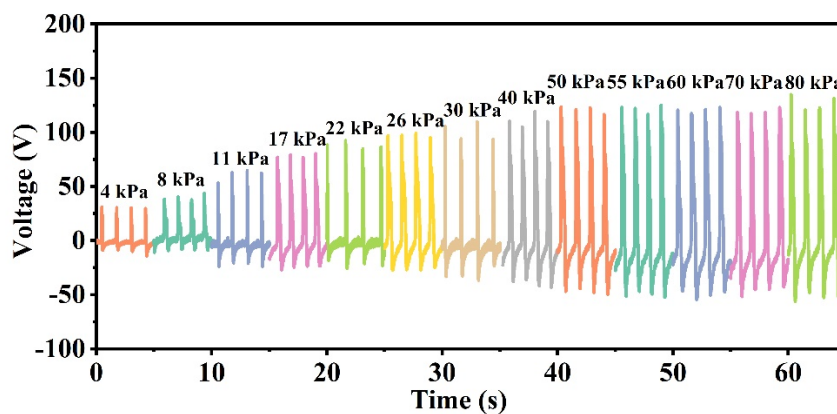

Figure S17 The voltage output of 1@S-PDMS(800#) (spin-coating at 7 cycles) under various palm stresses.

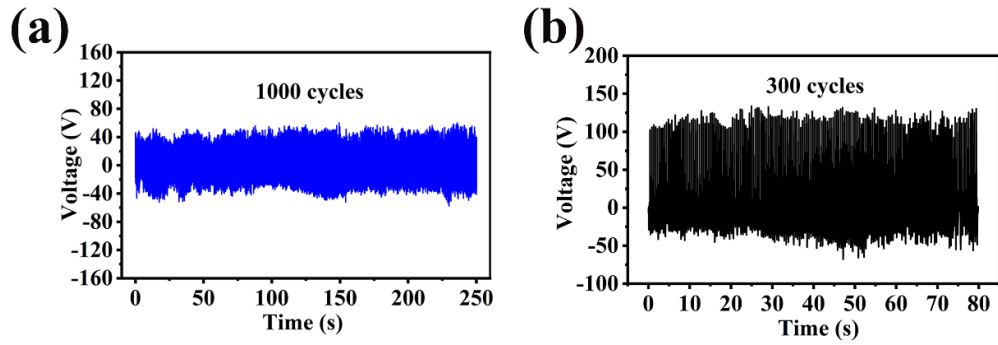

**Figure S18** Voltage output stability of the 1@S-PDMS(800#) (spin-coating at 7 cycles) sensor device under various palm stresses: (a) With 10 kPa palm stress. (b) With 70 kPa palm stress.

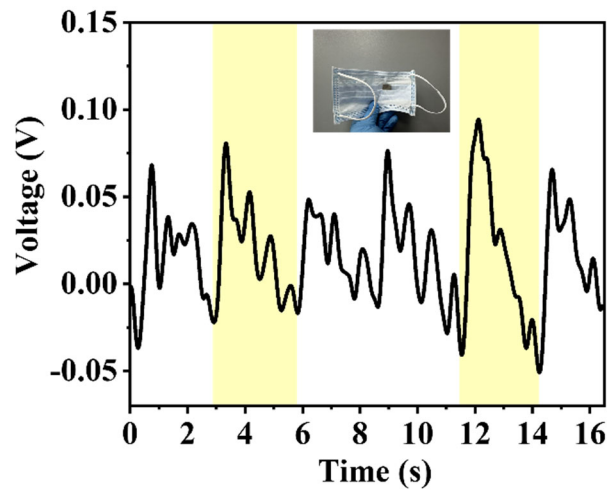

**Figure S19** Signal responses corresponding to air pressure during breathing when the sensor was attached to the face mask.

**Table S1 Crystal data and structure refinement of 1 at 300 K.**

| Compound                                                                    | 1                                                               |
|-----------------------------------------------------------------------------|-----------------------------------------------------------------|
| Empirical formula                                                           | C <sub>5</sub> H <sub>13</sub> Br <sub>5</sub> GaN              |
| Formula weight                                                              | 556.43                                                          |
| Temperature (K)                                                             | 300(1)                                                          |
| Crystal system                                                              | Orthorhombic                                                    |
| Space group                                                                 | <i>Cmc</i> 2 <sub>1</sub>                                       |
| <i>a</i> (Å)                                                                | 8.5264(3)                                                       |
| <i>b</i> (Å)                                                                | 12.9009(3)                                                      |
| <i>c</i> (Å)                                                                | 13.4160(4)                                                      |
| $\alpha$ (deg.)                                                             | 90                                                              |
| $\beta$ (deg.)                                                              | 90                                                              |
| $\gamma$ (deg.)                                                             | 90                                                              |
| <i>V</i> (Å <sup>3</sup> )                                                  | 1475.74(8)                                                      |
| <i>Z</i>                                                                    | 4                                                               |
| $\rho_{cal}$ (g · cm <sup>-3</sup> )                                        | 2.504                                                           |
| $\mu$ (mm <sup>-1</sup> )                                                   | 13.003                                                          |
| <i>F</i> (000)                                                              | 1024.0                                                          |
| Reflections collected                                                       | 2419                                                            |
| <i>R</i> <sub>int</sub>                                                     | 0.0309                                                          |
| Data / restraints / parameters                                              | 1094/0/53                                                       |
| GOOFs                                                                       | 1.092                                                           |
| <i>R</i> <sub>1</sub> / <i>wR</i> <sub>2</sub> [ <i>I</i> > 2σ( <i>I</i> )] | <i>R</i> <sub>1</sub> = 0.0455, <i>wR</i> <sub>2</sub> = 0.1144 |
| <i>R</i> <sub>1</sub> / <i>wR</i> <sub>2</sub> (all data)                   | <i>R</i> <sub>1</sub> = 0.0491, <i>wR</i> <sub>2</sub> = 0.1167 |
| Largest diff. peak/hole (e · Å <sup>-3</sup> )                              | 0.86/-0.80                                                      |

**Table S2 Calculation of  $P_s$ .**

| Temperature (K) | Dipole moment (Debye) | Saturated polarization ( $\mu\text{C cm}^{-2}$ ) |
|-----------------|-----------------------|--------------------------------------------------|
| 300             | 54.9004               | 12.28                                            |

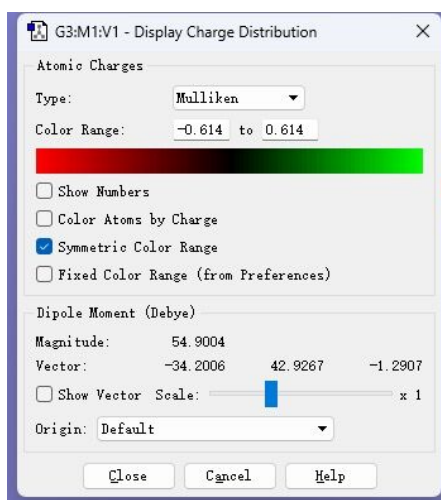

According to the crystal structure data collected at 300 K, the dipole moment of the crystal cell:  $\mu = 26.3785$  Debye, based on the G2:M1:V1-Display Charge Distribution calculations;

$$P_s = \sum Z_e \Delta r / V = 54.9004 \times 10^{-18} \text{ esu} \cdot \text{cm} / (1475.74(8) \times 10^{-30} \text{ m}^3) \approx 0.122766 \text{ C m}^2 = 12.28 \mu\text{C cm}^{-2}$$

**Table S3 A summary of the output performance of the molecule-based ferroelectric composite films and energy harvesting devices of inorganic ceramics which combine the piezoelectric and triboelectric.**

| Piezoelectric substrate                                                                                                     | Materials and | Working Mechanism              | $V_{oc}$ (V) | $J_{sc}$ ( $\mu\text{A}/\text{cm}^2$ ) | Power density ( $\mu\text{W}/\text{cm}^2$ ) | ref       |
|-----------------------------------------------------------------------------------------------------------------------------|---------------|--------------------------------|--------------|----------------------------------------|---------------------------------------------|-----------|
| [(CH <sub>3</sub> ) <sub>3</sub> NCH <sub>2</sub> CH <sub>2</sub> Cl][GaBr <sub>4</sub> ]-PDMS                              |               | Piezoelectric                  | 179          | 6.4 $\mu\text{A}$                      | 120                                         | 1         |
| MA-SnBr <sub>3</sub> -PDMS                                                                                                  |               | Piezoelectric                  | 18.8         | 13.76                                  | 74.52                                       | 2         |
| FA-PbBr <sub>3</sub> -PDMS                                                                                                  |               | Piezoelectric                  | 8.5          | 3.8                                    | 12                                          | 3         |
| MA-SnI <sub>3</sub> -PVDF                                                                                                   |               | Piezoelectric                  | 12           | 4                                      | 21.6                                        | 4         |
| FA-PbBr <sub>3</sub> -PVDF                                                                                                  |               | Piezoelectric                  | 30           | 6.2                                    | 27.4                                        | 5         |
| [BnNMe <sub>2</sub> <sup>Pr</sup> ] <sub>2</sub> CdBr <sub>4</sub> -PDMS                                                    |               | Piezoelectric                  | 63.8         | 0.59                                   | 37.1                                        | 6         |
| HETMA-CdCl <sub>3</sub> -PDMS                                                                                               |               | Piezoelectric                  | 55.2         | 4.02                                   | 70.9                                        | 7         |
| TMCM-CdCl <sub>3</sub> -PDMS                                                                                                |               | Piezoelectric                  | 41           | 3.45                                   | 115.2                                       | 8         |
| C <sub>6</sub> H <sub>5</sub> N(CH <sub>3</sub> ) <sub>3</sub> CdBr <sub>2</sub> Cl <sub>0.75</sub> I <sub>0.25</sub> -PDMS |               | Piezoelectric                  | 210          | 64                                     | 1100                                        | 9         |
| PZT-Silicon rubber with PTFE particles                                                                                      |               | Piezoelectric<br>Triboelectric | 600          | 17 $\mu\text{A}$                       | 111                                         | 10        |
| PVDF and BTO nanofibre-PDMS                                                                                                 |               | Piezoelectric<br>Triboelectric | 160          | -                                      | 222                                         | 11        |
| Ag NWS and BTO-PDMS                                                                                                         |               | Piezoelectric<br>Triboelectric | 105          | 6.5                                    | 102                                         | 12        |
| V-NaNbO <sub>3</sub> -PDMS                                                                                                  |               | Piezoelectric<br>Triboelectric | 200          | 5.7 $\mu\text{A}$                      | 480                                         | 13        |
| BTO nano particles-Porous PDMS                                                                                              |               | Piezoelectric<br>Triboelectric | 280          | 5.6 $\mu\text{A}$                      | 41                                          | 14        |
| PVDF and Silk fibre                                                                                                         |               | Piezoelectric<br>Triboelectric | 500          | 12 $\mu\text{A}$                       | 310                                         | 15        |
| BTO nanorods-CS                                                                                                             |               | Piezoelectric<br>Triboelectric | 247          | 36.7                                   | 1570                                        | 16        |
| 3D-printed BTO-PDMS                                                                                                         |               | Piezoelectric<br>Triboelectric | 405          | 38 $\mu\text{A}$                       | 2200                                        | 17        |
| ZnSnO <sub>3</sub> nanocubes-PDMS                                                                                           |               | Piezoelectric<br>Triboelectric | 400          | 7                                      | 750                                         | 18        |
| Ca doped BZT-PDMS                                                                                                           |               | Piezoelectric<br>Triboelectric | 550          | 34 $\mu\text{A}$                       | 2360                                        | 19        |
| ZnO nanoflakes-PDMS                                                                                                         |               | Piezoelectric<br>Triboelectric | 470          | 60                                     | 28200                                       | 20        |
| PVDF/TMCM-MnCl <sub>3</sub> (ultrasound-driven)                                                                             |               | Piezoelectric<br>Triboelectric | 29.2         | 900 $\mu\text{A}$                      | 1020                                        | 21        |
| [(CH <sub>3</sub> ) <sub>3</sub> NCH <sub>2</sub> CH <sub>2</sub> Br][GaBr <sub>4</sub> ] <sup>@</sup> S-PDMS               |               | Piezoelectric<br>Triboelectric | 125          | 25 $\mu\text{A}$                       | 490                                         | This Work |

**Table S4 Comparison of the sensitivity and monitoring range of the materials based composite films on different mechanisms (piezoelectric, triboelectric, synergy of piezoelectric and triboelectric).**

| Piezoelectric Materials                                 | Working Mechanism              | Sensitivity                                      | Monitoring Range | ref |
|---------------------------------------------------------|--------------------------------|--------------------------------------------------|------------------|-----|
| [C(NH <sub>2</sub> ) <sub>3</sub> ]ClO <sub>4</sub> -PU | Piezoelectric                  | 170 mV/kPa (0-1 kPa)<br>40 mV/kPa (1-5 kPa)      | 0-5 kPa          | 22  |
| ZnO-PAN/MXene/PDA                                       | Piezoelectric                  | 28.56 V/N (0-2 N)                                | 0-2 N            | 23  |
| PVDF and GS-PVDF                                        | Piezoelectric                  | 0.83 V/N (0-6 N)                                 | 0-6 N            | 24  |
| dabcoH-ReO <sub>4</sub> -PVDF                           | Piezoelectric                  | 0.38 V/N (1-10 N)                                | 1-10 N           | 25  |
| ZnS:Cu-PAN                                              | Piezoelectric                  | 2.46 V/N (0.1-1.96 N)                            | 0.1-1.96 N       | 26  |
| Nb <sub>2</sub> CT <sub>x</sub> -PDMS and BTO-PVDF      | Piezoelectric                  | 16.1 V/N (0.1-0.6 N)<br>0.39 V/N (0.6-30 N)      | 0.1-30 N         | 27  |
| UiO-66-NO <sub>2</sub> -PAN                             | Piezoelectric                  | 5.62 V/N (1-20 N)<br>0.88 V/N (20-160 N)         | 1-160 N          | 28  |
| PZT nano particles-P(VDF-TrFE)                          | Piezoelectric                  | 1.38 V/kPa (0-32 kPa)<br>0.81 V/kPa (32-128 kPa) | 0-128 kPa        | 29  |
| GaN@PDMS                                                | Piezoelectric                  | 14.25 V/kPa (0-1.6 kPa)                          | 0-1.6 kPa        | 30  |
| Liquid metal based PDMS sponge                          | Triboelectric                  | 0.44 V/N (20-101 N)                              | 20-101 N         | 31  |
| Micropatterend PDMS                                     | Triboelectric                  | 44.31 V/kPa (0-2 kPa)<br>7.16 V/kPa (2-8 kPa)    | 0-8kPa           | 32  |
| ZnO/C-PVDF                                              | Piezoelectric<br>Triboelectric | 2.44 V/N (0-16 N)                                | 0-16 N           | 33  |
| PVDF and PTFE and Nylon                                 | Piezoelectric<br>Triboelectric | 1.3 V/N (0.4-1.6 N)<br>6.2 V/N (1.6-2.8 N)       | 0.4-2.8 N        | 34  |
| 3D-printed BTO-PDMS                                     | Piezoelectric<br>Triboelectric | 2 V/N (0-60 N)<br>1.6 V/N (60-220 N)             | 0-220 N          | 17  |

|                                                                                                      |                                |                                                                 |                      |              |
|------------------------------------------------------------------------------------------------------|--------------------------------|-----------------------------------------------------------------|----------------------|--------------|
| BTO-PDMS                                                                                             | Piezoelectric<br>Triboelectric | 0.3 V/kPa<br>(0-200 kPa)<br>0.05 V/kPa<br>(200-800<br>kPa)      | 0-800 kPa            | 35           |
| PZT-PEDOT:PSS                                                                                        | Piezoelectric<br>Triboelectric | 0.23 V/N<br>(0-12N)                                             | 0-12 N               | 36           |
| BTO nano particles-Porous<br>PDMS                                                                    | Piezoelectric<br>Triboelectric | 2.1 V/cm (a<br>6.2 g ball<br>drop from<br>different<br>heights) | 10-60 cm<br>(Height) | 14           |
| PVDF/TMCM-MnCl <sub>3</sub><br>(mechanical force)                                                    | Piezoelectric<br>Triboelectric | 6.21 V/kPa                                                      | -                    | 21           |
| [(CH <sub>3</sub> ) <sub>3</sub> NCH <sub>2</sub> CH <sub>2</sub> Br][GaBr <sub>4</sub> ]<br>@S-PDMS | Piezoelectric<br>Triboelectric | 3.57 V/kPa<br>(0-24 kPa)<br>1.02 V/kPa<br>(24-45 kPa)           | 0-45 kPa             | This<br>work |

---



## Notes and references

- 1 B. Wang, Z. R. Li, Z. X. Tang, H. X. Zhao, L. S. Long, L. S. Zheng, *Chem. Sci.*, 2024, **15**, 15192.
- 2 S. Ippili, V. Jella, J. Kim, S. Hong, S. G. Yoon, *ACS Appl. Mater. Interfaces*, 2020, **12**, 16469.
- 3 R. Ding, H. Liu, X. Zhang, J. Xiao, R. Kishor, H. Sun, B. Zhu, G. Chen, F. Gao, X. Feng, J. Chen, X. Chen, X. Sun, Y. Zheng, *Adv. Funct. Mater.*, 2016, **26**, 7708.
- 4 S. Ippili, V. Jella, J. H. Eom, J. Kim, S. Hong, J. S. Choi, V. D. Tran, N. Van Hieu, Y. J. Kim, H. J. Kim, S. G. Yoon, *Nano Energy*, 2019, **57**, 911.
- 5 R. Ding, X. Zhang, G. Chen, H. Wang, R. Kishor, J. Xiao, F. Gao, K. Zeng, X. Chen, X. W. Sun, Y. Zheng, *Nano Energy*, 2017, **37**, 126.
- 6 S. Deswal, S. K. Singh, P. Rambabu, P. Kulkarni, G. Vaitheeswaran, B. Praveenkumar, S. Ogale, R. Boomishankar, *Chem. Mater.*, 2019, **31**, 4545.
- 7 S. Deswal, S. K. Singh, R. Pandey, P. Nasa, D. Kabra, B. Praveenkumar, S. Ogale, R. Boomishankar, *Chem. Mater.*, 2020, **32**, 8333.
- 8 Y. J. Gong, Z. G. Li, H. Chen, T. M. Guo, F.-F. Gao, G.-J. Chen, Y. Zhang, Y. M. You, W. Li, M. He, X. H. Bu, J. Yu, *Matter*, 2023, **6**, 2066.
- 9 Y. Hu, K. Parida, H. Zhang, X. Wang, Y. Li, X. Zhou, S. A. Morris, W. H. Liew, H. Wang, T. Li, F. Jiang, M. Yang, M. Alexe, Z. Du, C. L. Gan, K. Yao, B. Xu, P. S. Lee, H. J. Fan, *Nature Commun.*, 2022, **13**, 5607.
- 10 J. He, S. Qian, X. Niu, N. Zhang, J. Qian, X. Hou, J. Mu, W. Geng, X. Chou, *Nano Energy*, 2019, **64**, 103933.
- 11 J. Song, B. Yang, W. Zeng, Z. Peng, S. Lin, J. Li, X. Tao, *Adv. Mater. Technologies*, 2018, **3**, 1800016.
- 12 X. Chen, K. Parida, J. Wang, J. Xiong, M. F. Lin, J. Shao, P. S. Lee, *ACS Appl. Mater. Interfaces*, 2017, **9**, 42200.
- 13 M. V. Paranjape, J. Kim, Y. Kim, E. Jo, S. A. Graham, P. Manchi, J. K. Lee, J. S. Yu, *Composites Science and Technology*, 2023, **242**, 110195.
- 14 M. Sahu, V. Vivekananthan, S. Hajra, D. K. Khatua, S. J. Kim, *Applied Materials*

*Today*, 2021, **22**, 100900.

15 Y. Guo, X. S. Zhang, Y. Wang, W. Gong, Q. Zhang, H. Wang, J. Brugger, *Nano Energy*, 2018, **48**, 152.

16 S. Pongampai, T. Charoonsuk, N. Pinpru, P. Pulphol, W. Vittayakorn, P. Pakawanit, N. Vittayakorn, *Composites Part B: Engineering*, 2021, **208**, 108602.

17 K. K. Meena, I. Arief, A. K. Ghosh, H. Liebscher, S. Hait, J. Nagel, G. Heinrich, A. Fery, A. Das, *Nano Energy*, 2023, **115**, 108707.

18 G. Wang, Y. Xi, H. Xuan, R. Liu, X. Chen, L. Cheng, *Nano Energy*, 2015, **18**, 28.

19 H. Patnam, B. Dudem, N. R. Alluri, A. R. Mule, S. A. Graham, S. J. Kim, J. S. Yu, *Composites Science and Technology*, 2020, **188**, 107963.

20 W. He, Y. Qian, B. S. Lee, F. Zhang, A. Rasheed, J. E. Jung, D. J. Kang, *ACS Appl. Mater. Interfaces*, 2018, **10**, 44415.

21 P. Chen, C. Cheng, X. Yang, T. Sha, X. Zou, F. Zhang, W. Jiang, Y. Xu, X. Cao, Y. M. You, Z. Luo, *ACS Nano*, 2023, **17**, 25625.

22 W. Li, C. Li, G. Zhang, L. Li, K. Huang, X. Gong, C. Zhang, A. Zheng, Y. Tang, Z. Wang, Q. Tong, W. Dong, S. Jiang, S. Zhang, Q. Wang, *Adv. Mater.*, 2021, **33**, 2104107.

23 Y. Huang, S. Chen, Y. Li, Q. Lin, Y. Wu, Q. Shi, *Chemical Engineering Journal*, 2024, **488**, 150997.

24 L. Lu, N. Zhao, J. Liu, B. Yang, *J. Mater. Chem. C*, 2021, **9**, 9309.

25 Q. Li, W. Ke, T. Chang, Z. Hu, *J. Mater. Chem. C*, 2019, **7**, 1532.

26 Y. Huang, R. Xue, L. An, Q. Shi, W. Zhang, Y. Wu, R. Liu, *Smart Mater. Struct.*, 2023, **32**, 095018.

27 C. Cao, P. Zhou, J. Wang, M. Liu, P. Wang, Y. Qi, T. Zhang, *Journal of Colloid and Interface Science*, 2024, **664**, 902.

28 Q. Lin, S. Chen, Y. Huang, H. Wang, Y. Wu, Y. Jin, R. Liu, Q. Shi, Y. Liang, *Polymer*, 2024, **304**, 127162.

29 J. Wang, Y. Fu, F. Liu, C. Cao, M. Liu, L. Yu, P. Zhou, X. Shang, G. Wang, T. Zhang, Y. Qi, *Sensors and Actuators A: Physical*, 2024, **374**, 115473.

30 A. Waseem, M. A. Johar, M. A. Hassan, I. V. Bagal, A. Abdullah, J.-S. Ha, J. K. Lee, S. W. Ryu, *Journal of Alloys and Compounds*, 2021, **872**, 159661.

- 31 Y. Wang, C. Zhao, L. Chen, Q. Wu, Z. Zhao, J. J. Lv, S. Wang, S. Pan, M. Xu, Y. Chen, H. Jin, *Nano Energy*, 2024, **127**, 109808.
- 32 Y. Zhong, J. Wang, L. Han, S. Dai, H. Zhu, J. Hua, G. Cheng, J. Ding, *Sensors and Actuators A: Physical*, 2023, **349**, 114013.
- 33 X. Li, D. Ji, B. Yu, R. Ghosh, J. He, X. Qin, S. Ramakrishna, *Chemical Engineering Journal*, 2021, **426**, 130345.
- 34 C. Song, K. Xia, Z. Xu, *Microelectronic Engineering*, 2022, **256**, 111723.
- 35 J. Yu, L. Chen, X. Hou, J. Mu, J. He, W. Geng, X. Qiao, X. Chou, *Journal of Materiomics*, 2022, **8**, 247.
- 36 M. Zhu, Q. Shi, T. He, Z. Yi, Y. Ma, B. Yang, T. Chen, C. Lee, *ACS Nano*, 2019, **13**, 1940.
